# Supplementary material
Source: MDPI journal article supplement (https://www.mdpi.com/1424-2818/15/9/958)

Blue: *P. m. peguense* (Subclade 3)

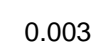

Supplement: s1 [file s1]
